# Supplementary material
Source: PubMed Central journal article supplement (PMC9683866)
Supplement: mmc1.pdf [file mmc1.pdf]

Ka/Ks annotated evolutionary tree

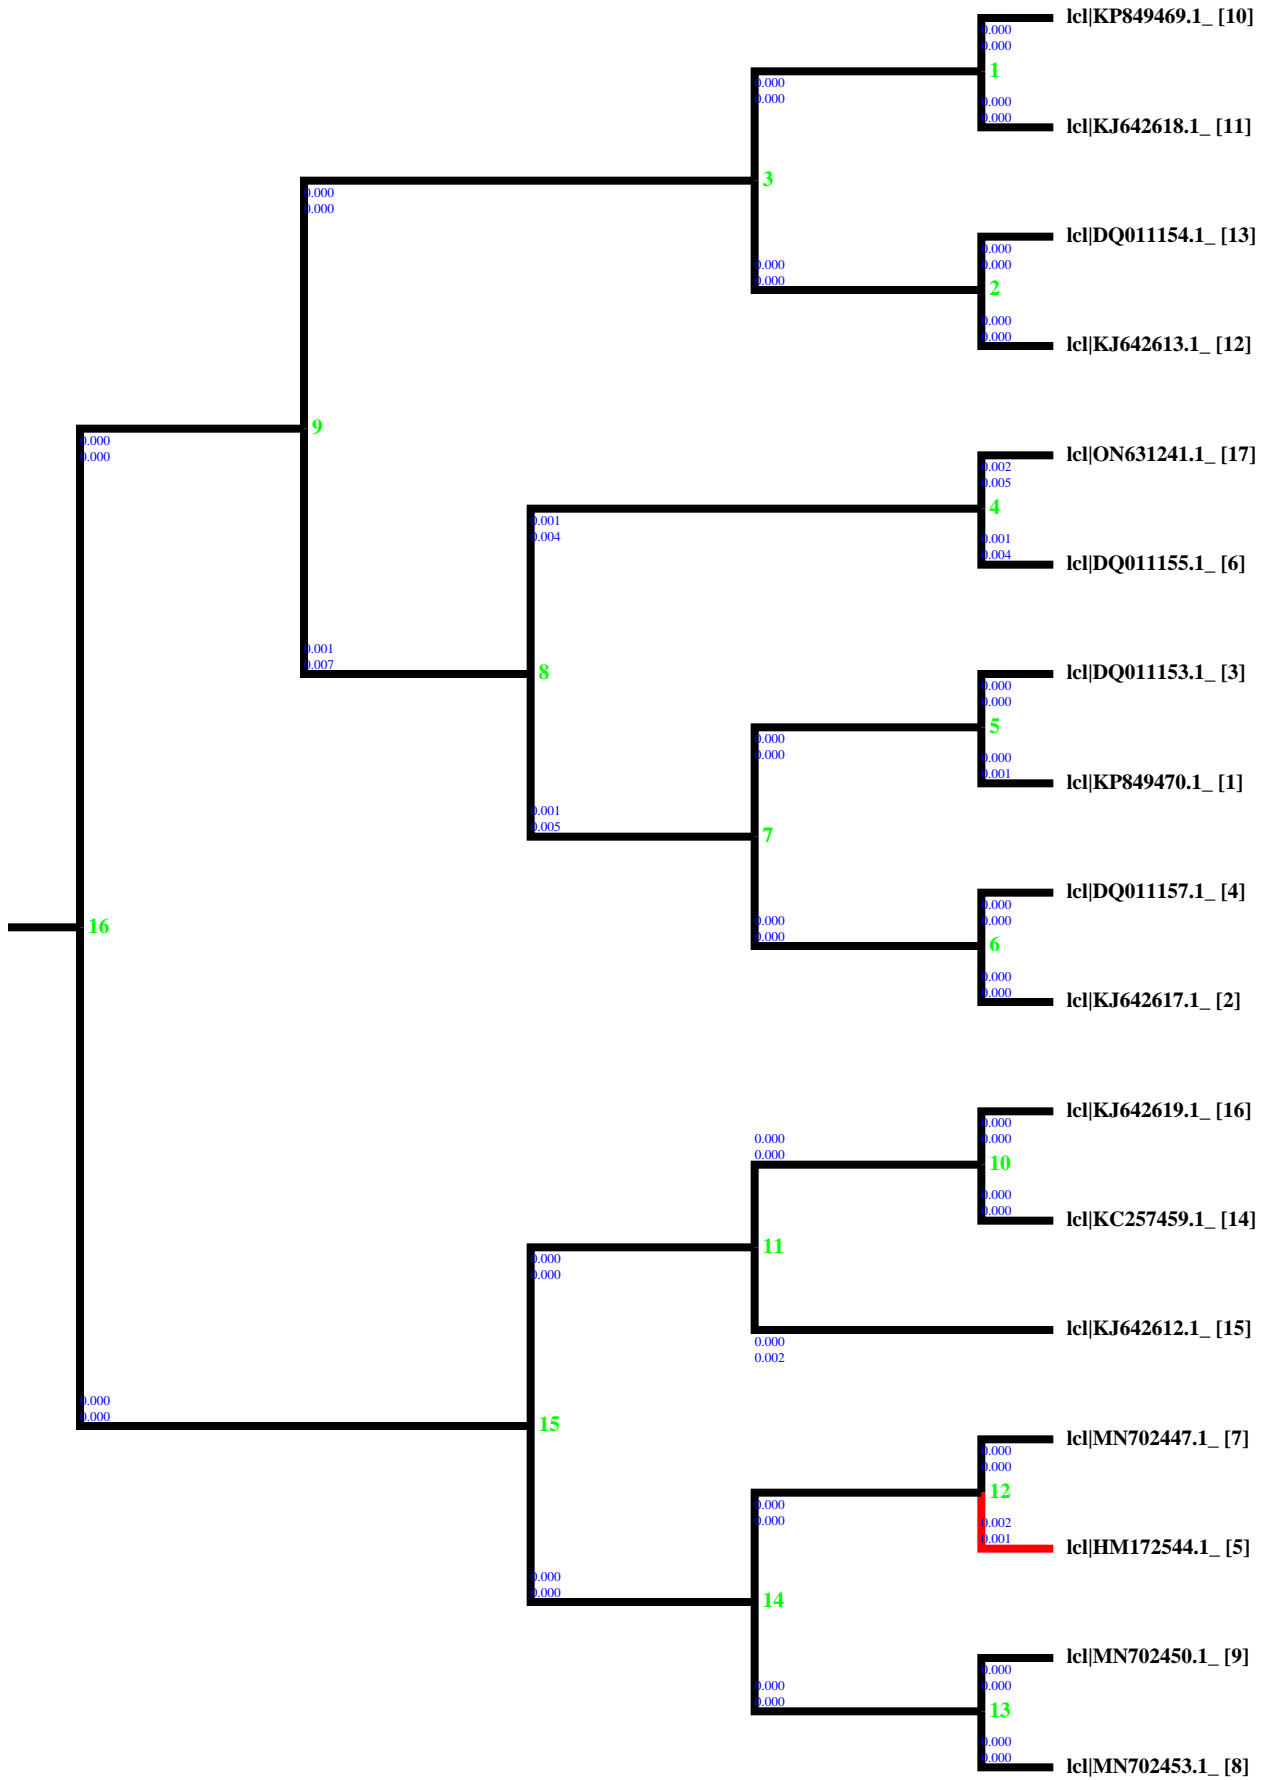

| Node# | Ka/Ks Branch1 | Ka Branch1 | Ks Branch1 | Ka/Ks Branch2 | Ka Branch2 | Ks Branch2 |
|-------|---------------|------------|------------|---------------|------------|------------|
| 1     | 0             | 0          | 1.00E-10   | 0             | 0          | 1.00E-10   |
| 2     | 0             | 0          | 1.00E-10   | 0             | 0          | 1.00E-10   |
| 3     | 0             | 0          | 1.00E-10   | 0             | 0          | 1.00E-10   |
| 4     | 0.3571        | 0.001633   | 0.00457208 | 0.1963        | 0.000719   | 0.00366187 |
| 5     | 0             | 0          | 1.00E-10   | 0             | 0          | 0.0009038  |
| 6     | 0             | 0          | 0.00045119 | 0             | 0          | 0.00045119 |
| 7     | 0             | 0          | 0.00045119 | 0             | 0          | 0.00045119 |
| 8     | 0.1962        | 0.000719   | 0.00366454 | 0.1571        | 0.000719   | 0.00457429 |
| 9     | 0             | 0          | 1.00E-10   | 0.1959        | 0.001439   | 0.0073448  |
| 10    | 0             | 0          | 1.00E-10   | 0             | 0          | 1.00E-10   |
| 11    | 0             | 0          | 0.0018088  | 0             | 0          | 1.00E-10   |
| 12    | 0             | 0          | 1.00E-10   | 2.1025        | 0.002103   | 0.0009042  |
| 13    | 0             | 0          | 1.00E-10   | 0             | 0          | 1.00E-10   |
| 14    | 0             | 0          | 1.00E-10   | 0             | 0          | 1.00E-10   |
| 15    | 0             | 0          | 1.00E-10   | 0             | 0          | 1.00E-10   |
| 16    | 0             | 0          | 1.00E-10   | 0             | 0          | 1.00E-10   |
